# Supplementary material
Source: PubMed Central journal article supplement (PMC6460430)
Supplement: 41422_2018_128_MOESM3_ESM.pdf [file 41422_2018_128_MOESM3_ESM.pdf]

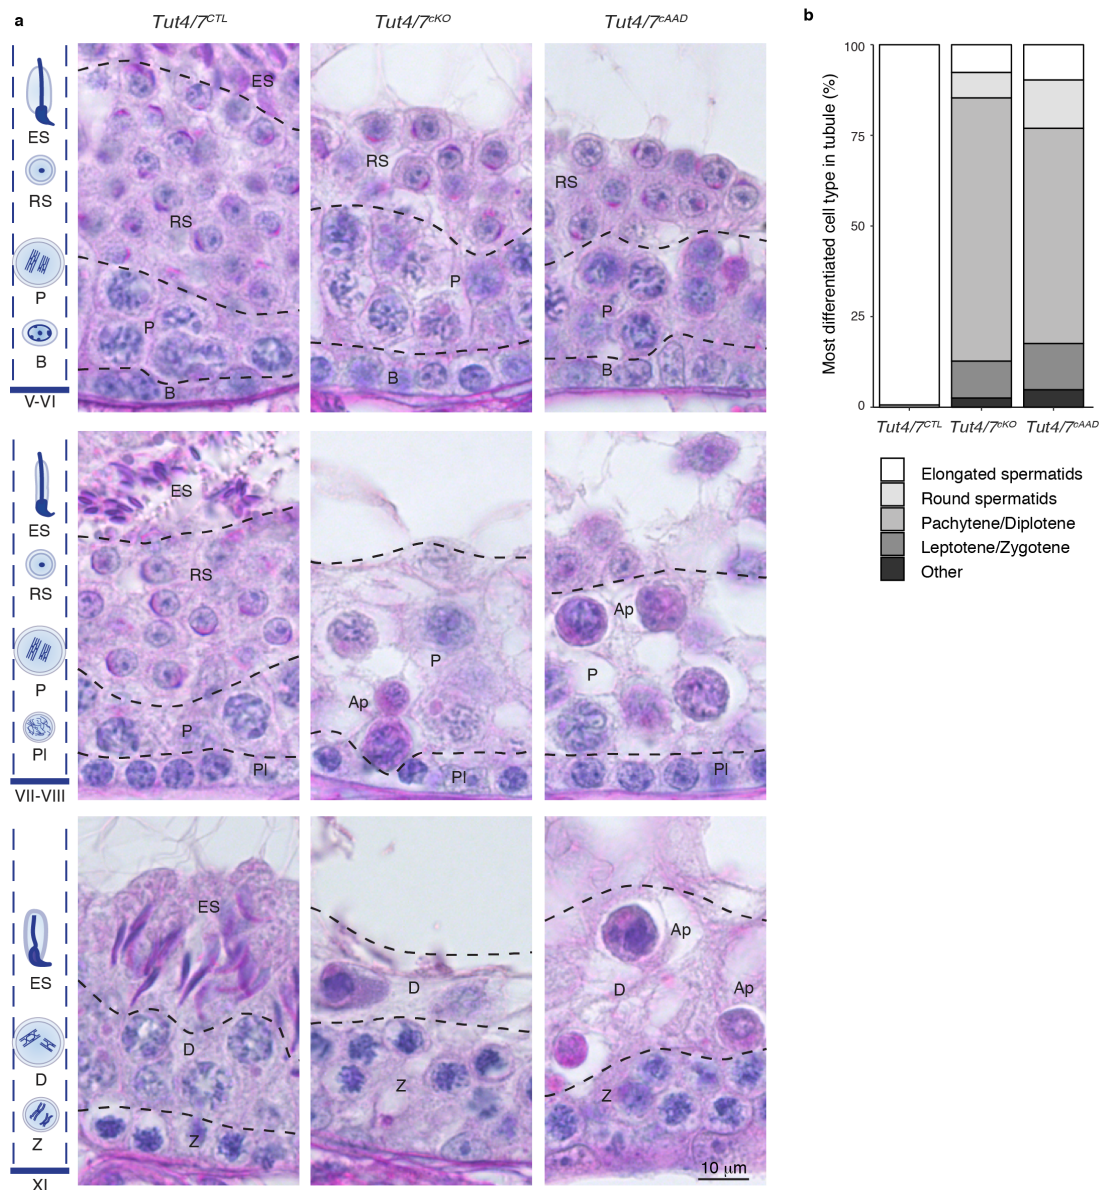

**Supplementary Figure 3. T<sub>UT</sub>4/7-deficiency results in late pachytene spermatogenic arrest.** **a.** PAS staining of tubules at stages V-VI, VII-VIII or XI of the seminiferous cycle from *Tut4/7<sup>CTL</sup>*, *Tut4/7<sup>CKO</sup>* and *Tut4/7<sup>cAAD</sup>* animals. On the left, a schematic representation of the cell layers present at the different stages is presented. ES, elongating spermatids; RS, round spermatids; P, pachytene cell; B, B spermatogonia; Pl, pre-leptotene cell; D, diplotene cell; Z, zygotene cell and Ap, apoptotic cell. **b.** The percentages of most differentiated cell type across seminiferous tubules from *Tut4/7<sup>CTL</sup>*, *Tut4/7<sup>CKO</sup>* and *Tut4/7<sup>cAAD</sup>* animals are shown. (Animals per genotype, n=3; Tubules per animal, n≥50.)
