# Supplementary material
Source: PubMed Central journal article supplement (PMC6460430)
Supplement: 41422_2018_128_MOESM9_ESM.pdf [file 41422_2018_128_MOESM9_ESM.pdf]

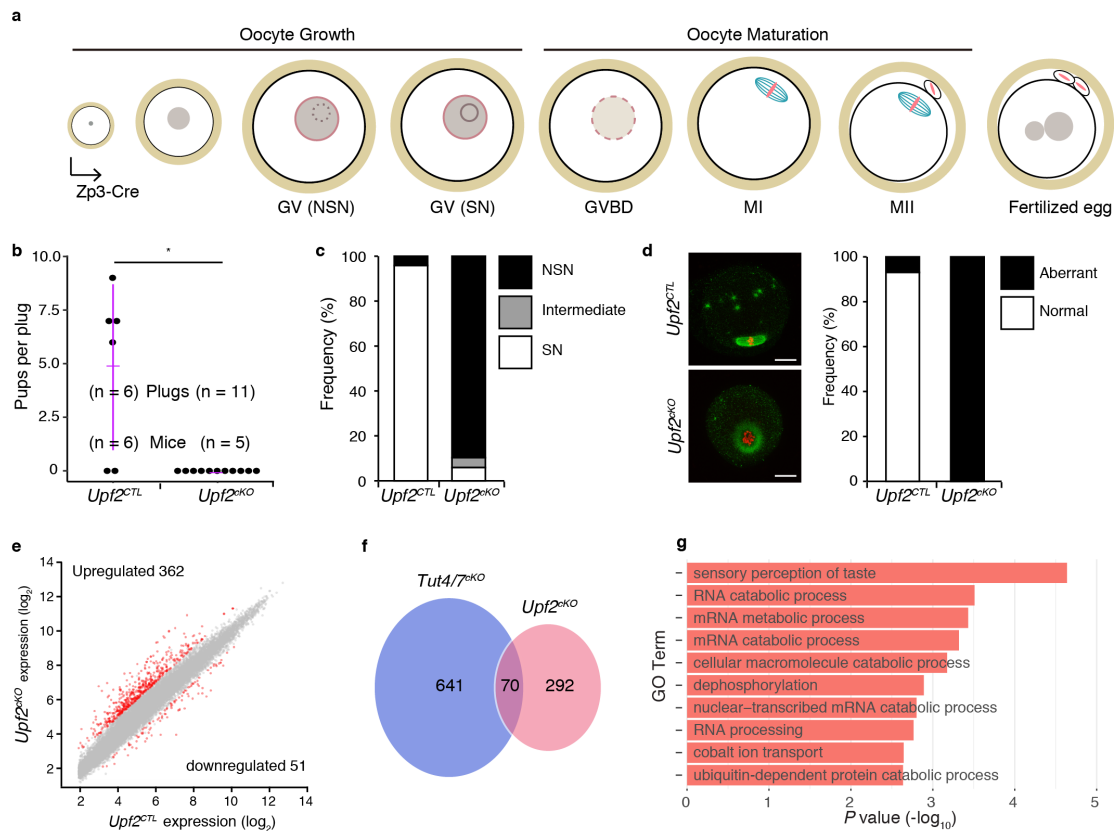

**Supplementary Figure 9. UPF2 is essential for oocyte growth.** **a**, Schematic representation of oocyte growth and maturation. *Zp3* starts to be expressed at the early stage of growing oocyte in primordial follicles. **b**, Number of pups born per plug from *Upf2<sup>CTL</sup>* (*Upf2<sup>+/β1</sup>; Zp3Cre Tg<sup>+</sup>*) and *Upf2<sup>cKO</sup>* (*Upf2<sup>fl/β1</sup>; Zp3Cre Tg<sup>+</sup>*) mice. The number of mice and plugs examined are indicated. Horizontal bars represent the mean, and the error bars the standard deviation. (\**P* < 0.05; t-test two-sided). **c**, Frequency of non-surrounded nucleolus and surrounded nucleolus states in *Upf2<sup>CTL</sup>* and *Upf2<sup>cKO</sup>* GV oocytes. (\**P* < 0.05, Fisher's exact test. *Upf2<sup>CTL</sup>*, *n* = 74 oocytes, *n* = 3 mice; and *Upf2<sup>cKO</sup>*, *n* = 68 oocytes, *n* = 3 mice). **d**, Left, representative confocal immunofluorescence micrographs showing *Upf2<sup>CTL</sup>* (top) and abnormal *Upf2<sup>cKO</sup>* (bottom) MII oocytes stained with anti-tubulin antibody (green) and Hoechst 33342 (red). Scale bars, 20 μm. Right, the frequency of abnormal MII oocytes is presented for the respective genotypes. (\**P* < 0.05, Fisher's exact test. *Upf2<sup>CTL</sup>*, *n* = 43 oocytes, *n* = 2 mice; *Upf2<sup>cKO</sup>*, *n* = 21 oocytes, *n* = 2 mice). **e**, Expression scatter plot showing relative average expression of transcripts between control and *Upf2<sup>cKO</sup>* GV oocytes. Significantly deregulated (*P* < 0.01, moderated *t*-statistic adjusted) genes with a fold change greater than two

are highlighted in red. (*Upf2<sup>CTL</sup>*, *n* = 3; *Upf2<sup>ckO</sup>*, *n* = 3). **f**, Venn diagram showing the common genes upregulated in *Tut4/7<sup>ckO</sup>* (*Tut4<sup>fl/fl</sup>*; *Tut7<sup>fl/fl</sup>*; *Zp3Cre Tg<sup>+</sup>*) and *Upf2<sup>ckO</sup>* GV oocytes. **g**, Gene ontology analysis of upregulated genes in *Upf2<sup>ckO</sup>* GV oocytes.
